# Supplementary material for: Structural insights into flavones as protein kinase CK2 inhibitors derived from a combined computational study
Source: Royal Society of Chemistry journal article supplement (doi:10.1039/c4ra10381e), 2014-11-19
Supplement: c4ra10381e1.pdf [file c4ra10381e1.pdf]

**Supporting Information**

(Total of 12 pages)

**for**

**Structural Insights into the Flavones as Protein  
Kinase CK2 Inhibitors Derived from a  
Combined Computational Study**

Min Lv, Shuying Ma, Yueli Tian, Xiaoyun Zhang\*, Honglin Zhai and Wenjuan Lv

College of Chemistry and Chemical Engineering, Lanzhou University, Lanzhou, 730000, Gansu

Province, People's Republic of China

## Table of contents

**Fig. S1** The alignments of 51 docked structures in the binding site of protein kinase CK2 (the inhibitors are represented as sticks and the protein is represented as ribbons).

**Fig. S2** The superposition of the Glide XP redocked **luteolin** and its original structure in the crystallographic complex. Carbon atoms in the crystal structure and the redocked conformation are colored in blue and magenta, respectively.

**Fig. S3** The correlation between experimental  $pIC_{50}$  and the docking scores predicted by (1) RRD with XP, (2) RRD with SP, (3) IFD with XP and (4) QPLD with XP.

**Fig. S4** Plots of the RMSD values relative to the initial structure of the new complexes including CK2-N1, CK2-N2, and CK2-N3 during the MD simulations. (a) Time evolution of the RMSD of all protein backbone atoms. (b) Time evolution of the RMSD of the heavy atoms for the ligand. (c) Time evolution of the RMSD of the  $C\alpha$  atoms for the residues around 5 Å of the ligand.

**Table S1** The structures and corresponding bioactivities of 51 inhibitors

**Table S2** Biological activities of the studied CK2 inhibitors and corresponding docking scores predicted by four different docking protocols

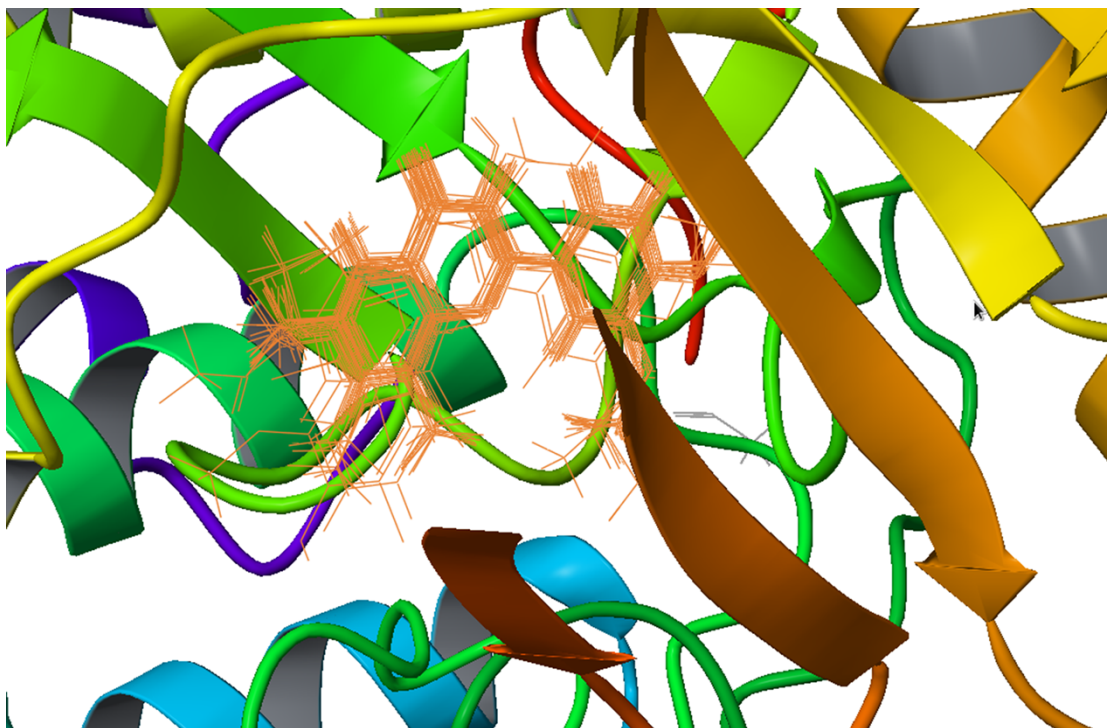

**Fig. S1** The alignments of 51 docked structures in the binding site of protein kinase CK2 (the inhibitors are represented as lines and the protein is represented as ribbons).

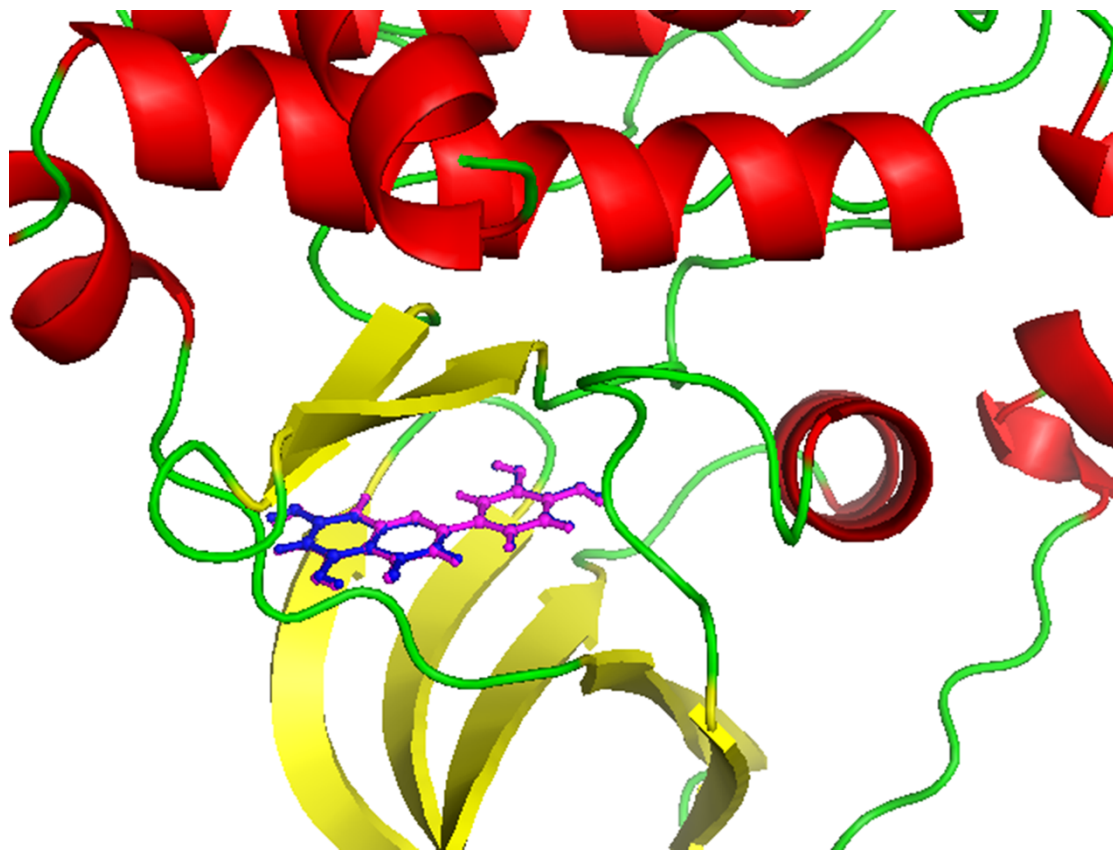

**Fig. S2** The superposition of the Glide XP redocked **luteolin** and its original structure in the crystallographic complex. Carbon atoms in the crystal structure and the redocked conformation are colored in blue and magenta, respectively.

**Fig. S3** The correlation between experimental  $pIC_{50}$  and the docking scores Predicted

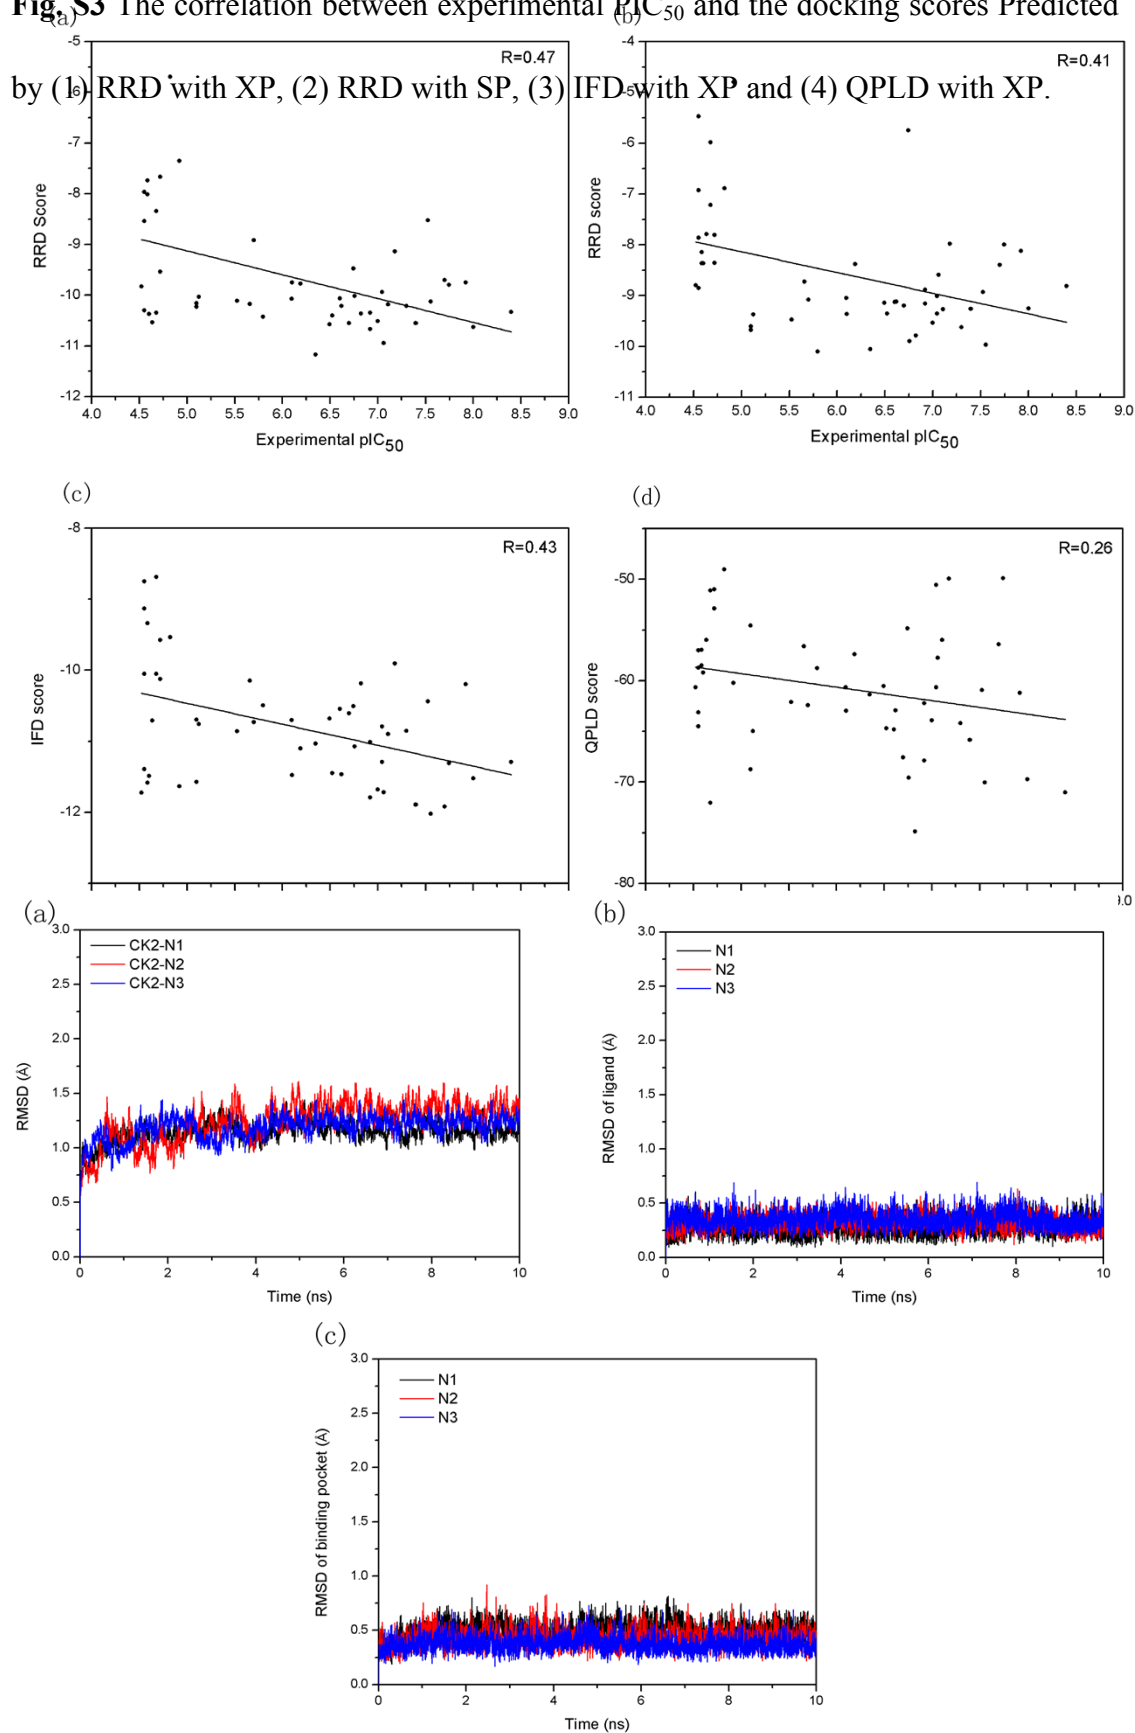

**Fig. S4** Plots of the RMSD values relative to the initial structure of the new

complexes including CK2-N1, CK2-N2, and CK2-N3 during the MD simulations. (a) Time evolution of the RMSD of all protein backbone atoms. (b) Time evolution of the RMSD of heavy atoms for the ligand. (c) Time evolution of the RMSD of the C $\alpha$  atoms for the residues around 5 Å of the ligand.

**Table S1** The structures and corresponding bioactivities of 51 inhibitors

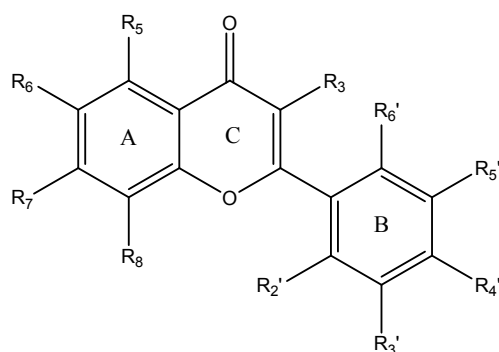

| ID    | R <sub>2</sub> ' | R <sub>3</sub> ' | R <sub>4</sub> ' | R <sub>5</sub> ' | R <sub>6</sub> ' | R <sub>3</sub> | R <sub>5</sub> | R <sub>6</sub> | R <sub>7</sub> | R <sub>8</sub> | IC <sub>50</sub> ( $\mu$ M) | PIC <sub>50</sub> |
|-------|------------------|------------------|------------------|------------------|------------------|----------------|----------------|----------------|----------------|----------------|-----------------------------|-------------------|
| FNH3  | H                | H                | OMe              | H                | H                | H              | H              | OH             | H              | H              | 30                          | 4.52              |
| FNH12 | H                | OMe              | OH               | H                | H                | H              | H              | H              | H              | H              | 0.8                         | 6.10              |
| FNH13 | H                | OEt              | OH               | H                | H                | H              | H              | H              | H              | H              | 7.5                         | 5.12              |
| FNH16 | H                | OEt              | OH               | H                | H                | H              | H              | Me             | H              | H              | 8                           | 5.10              |

|              |    |     |              |     |   |                                    |                          |    |    |    |     |      |
|--------------|----|-----|--------------|-----|---|------------------------------------|--------------------------|----|----|----|-----|------|
| FNH17        | H  | H   | Cl           | H   | H | OH                                 | H                        | Me | H  | H  | 23  | 4.64 |
| FNH20        | H  | H   | <i>i</i> -Pr | H   | H | OH                                 | H                        | Me | H  | H  | 26  | 4.59 |
| FNH21        | OH | H   | H            | Br  | H | OH                                 | H                        | Me | H  | H  | 28  | 4.55 |
| FNH22        | H  | H   | OMe          | H   | H | OH                                 | H                        | Me | H  | H  | 28  | 4.55 |
| FNH23        | H  | OMe | H            | H   | H | OH                                 | H                        | Me | H  | H  | 25  | 4.60 |
| FNH27        | H  | H   | Me           | H   | H | H                                  | H                        | Me | H  | Me | 21  | 4.68 |
| FNH28        | H  | OMe | OH           | H   | H | H                                  | H                        | Me | H  | Me | 0.1 | 7.00 |
| FNH30        | H  | Br  | H            | H   | H | H                                  | H                        | OH | H  | H  | 19  | 4.72 |
| FNH31        | H  | OMe | OMe          | OMe | H | H                                  | H                        | OH | H  | H  | 26  | 4.59 |
| FNH36        | H  | H   | Me           | H   | H | H                                  | H                        | OH | H  | H  | 19  | 4.72 |
| FNH39        | H  | H   | Me           | H   | H | OCH <sub>2</sub> CO <sub>2</sub> H | H                        | Me | H  | Me | 28  | 4.55 |
| FNH40        | H  | H   | OMe          | H   | H | OSO <sub>2</sub> Me                | H                        | Me | H  | Me | 28  | 4.55 |
| FNH41        | H  | H   | OMe          | H   | H | OCO(1,4-                           | Me                       | H  | Me | H  | 21  | 4.68 |
| Benzodioxane |    |     |              |     |   |                                    |                          |    |    |    |     |      |
| -2-yl)       |    |     |              |     |   |                                    |                          |    |    |    |     |      |
| FNH48        | H  | H   | OMe          | H   | H | H                                  | CH <sub>2</sub> N(2-     |    | H  | H  | 12  | 4.92 |
|              |    |     |              |     |   |                                    | furfuryl)CH <sub>2</sub> |    |    |    |     |      |
|              |    |     |              |     |   |                                    | O                        |    |    |    |     |      |
| FNH49        | H  | H   | OMe          | H   | H | H                                  | CH <sub>2</sub> N(3-     |    | H  | H  | 15  | 4.82 |
|              |    |     |              |     |   |                                    | trifluorometh            |    |    |    |     |      |
|              |    |     |              |     |   |                                    | ylphenyl)CH <sub>2</sub> |    |    |    |     |      |
|              |    |     |              |     |   |                                    | O                        |    |    |    |     |      |

---

|       |   |     |    |     |   |   |    |     |    |    |       |      |
|-------|---|-----|----|-----|---|---|----|-----|----|----|-------|------|
| FNH52 | H | OH  | H  | H   | H | H | H  | Me  | H  | Me | 2.2   | 5.66 |
| FNH53 | H | H   | OH | H   | H | H | H  | Me  | H  | Me | 1.6   | 5.80 |
| FNH54 | H | H   | OH | H   | H | H | H  | Me  | H  | H  | 8     | 5.10 |
| FNH55 | H | OH  | OH | H   | H | H | H  | Me  | H  | Me | 0.45  | 6.35 |
| FNH56 | H | OMe | OH | H   | H | H | H  | OH  | H  | H  | 0.25  | 6.60 |
| FNH57 | H | OMe | OH | H   | H | H | H  | Me  | H  | H  | 0.32  | 6.49 |
| FNH58 | H | OMe | OH | H   | H | H | H  | OMe | H  | H  | 0.2   | 6.70 |
| FNH59 | H | OMe | OH | H   | H | H | H  | Cl  | H  | H  | 0.24  | 6.62 |
| FNH60 | H | OMe | OH | H   | H | H | H  | Et  | H  | H  | 0.12  | 6.92 |
| FNH61 | H | OMe | OH | H   | H | H | H  | NAc | H  | H  | 0.15  | 6.82 |
| FNH62 | H | OMe | OH | H   | H | H | H  | Br  | H  | H  | 0.12  | 6.92 |
| FNH63 | H | OMe | OH | H   | H | H | H  | H   | Me | H  | 0.09  | 7.05 |
| FNH64 | H | OMe | OH | Cl  | H | H | H  | Me  | H  | Me | 0.09  | 7.05 |
| FNH65 | H | OMe | OH | Br  | H | H | H  | Me  | H  | Me | 0.65  | 6.19 |
| FNH66 | H | OMe | OH | H   | H | H | H  | Cl  | Me | H  | 0.79  | 6.10 |
| FNH67 | H | OMe | OH | H   | H | H | H  | Me  | Me | H  | 3     | 5.52 |
| FNH68 | H | OMe | OH | H   | H | H | H  | Cl  | H  | Cl | 0.01  | 8.00 |
| FNH69 | H | OMe | OH | Cl  | H | H | H  | Cl  | H  | Cl | 0.02  | 7.70 |
| FNH70 | H | NO2 | OH | H   | H | H | H  | Me  | H  | Me | 0.012 | 7.92 |
| FNH71 | H | OMe | OH | H   | H | H | Me | H   | Me | H  | 0.03  | 7.52 |
| FNH72 | H | OMe | OH | NO2 | H | H | H  | Me  | H  | Me | 0.066 | 7.18 |
| FNH73 | H | Cl  | OH | Cl  | H | H | H  | Me  | H  | Me | 0.078 | 7.11 |

---



|       |   |     |    |    |   |   |    |     |                               |    |       |      |
|-------|---|-----|----|----|---|---|----|-----|-------------------------------|----|-------|------|
| FNH74 | H | Br  | OH | H  | H | H | H  | Me  | H                             | Me | 0.05  | 7.30 |
| FNH75 | H | Br  | OH | Br | H | H | H  | Me  | H                             | Me | 0.18  | 6.74 |
| FNH76 | H | OMe | OH | H  | H | H | H  | Cl  | H                             | Me | 0.04  | 7.40 |
| FNH77 | H | OMe | OH | H  | H | H | H  | H   | C <sub>4</sub> H <sub>4</sub> |    | 0.028 | 7.55 |
| FNH78 | H | OMe | OH | Cl | H | H | H  | Br  | H                             | Br | 0.018 | 7.74 |
| FNH79 | H | OMe | OH | H  | H | H | H  | Br  | H                             | Br | 0.004 | 8.40 |
| FNH80 | H | OMe | OH | Cl | H | H | H  | H   | C <sub>4</sub> H <sub>4</sub> |    | 0.087 | 7.06 |
| FNH81 | H | OMe | OH | H  | H | H | Me | Cl  | Me                            | H  | 2     | 5.70 |
| FNH82 | H | OMe | OH | H  | H | H | H  | H   | Me                            | Me | 0.3   | 6.52 |
| FNH83 | H | OMe | OH | H  | H | H | H  | OMe | H                             | H  | 0.175 | 6.76 |

**Table S2** Biological activities of the studied Ck2 inhibitors and corresponding docking scores predicted by four different docking protocols

| No.          | PIC <sub>50</sub> | XP      | SP     | IFD     | QPLD    |
|--------------|-------------------|---------|--------|---------|---------|
| <b>FNH3</b>  | 4.52              | -9.826  | -8.800 | -11.726 | -60.641 |
| <b>FNH12</b> | 6.10              | -10.074 | -9.047 | -10.703 | -60.652 |
| <b>FNH13</b> | 5.12              | -10.031 | -9.369 | -10.757 | -64.990 |
| <b>FNH16</b> | 5.10              | -10.227 | -9.607 | -11.571 | -68.751 |
| <b>FNH17</b> | 4.64              | -10.534 | -7.789 | -10.706 | -55.975 |
| <b>FNH20</b> | 4.59              | -7.738  | -8.148 | -11.586 | -58.486 |
| <b>FNH21</b> | 4.55              | -8.542  | -6.926 | -8.750  | -58.744 |

---

|              |      |         |         |         |         |
|--------------|------|---------|---------|---------|---------|
| <b>FNH22</b> | 4.55 | -10.298 | -8.854  | -11.392 | -64.514 |
| <b>FNH23</b> | 4.60 | -10.374 | -8.368  | -11.488 | -59.203 |
| <b>FNH27</b> | 4.68 | -10.344 | -7.214  | -10.050 | -51.086 |
| <b>FNH28</b> | 7.00 | -10.516 | -9.533  | -11.678 | -63.928 |
| <b>FNH30</b> | 4.72 | -9.539  | -7.806  | -10.121 | -50.987 |
| <b>FNH31</b> | 4.59 | -8.012  | -8.362  | -9.337  | -56.958 |
| <b>FNH36</b> | 4.72 | -7.666  | -8.359  | -9.572  | -52.861 |
| <b>FNH39</b> | 4.55 | -7.968  | -7.864  | -9.128  | -63.133 |
| <b>FNH40</b> | 4.55 | -5.965  | -5.473  | -10.051 | -56.984 |
| <b>FNH41</b> | 4.68 | -8.342  | -5.985  | -8.687  | -72.054 |
| <b>FNH48</b> | 4.92 | -7.353  | -4.797  | -11.636 | -60.230 |
| <b>FNH49</b> | 4.82 | -5.692  | -6.883  | -9.536  | -49.015 |
| <b>FNH52</b> | 5.66 | -10.176 | -8.725  | -10.147 | -56.592 |
| <b>FNH53</b> | 5.80 | -10.429 | -10.098 | -10.496 | -58.758 |
| <b>FNH54</b> | 5.10 | -10.155 | -9.676  | -10.698 | -54.570 |
| <b>FNH55</b> | 6.35 | -11.173 | -10.054 | -11.033 | -61.346 |
| <b>FNH56</b> | 6.60 | -10.066 | -9.126  | -10.543 | -64.837 |
| <b>FNH57</b> | 6.49 | -10.573 | -9.143  | -10.678 | -60.536 |
| <b>FNH58</b> | 6.70 | -10.554 | -9.200  | -10.605 | -67.577 |
| <b>FNH59</b> | 6.62 | -10.213 | -9.117  | -11.464 | -62.914 |
| <b>FNH60</b> | 6.92 | -10.666 | -9.161  | -11.791 | -67.866 |
| <b>FNH61</b> | 6.82 | -10.365 | -9.788  | -10.184 | -74.890 |

---

---

|              |      |         |        |         |         |
|--------------|------|---------|--------|---------|---------|
| <b>FNH62</b> | 6.92 | -10.348 | -8.884 | -11.012 | -62.234 |
| <b>FNH63</b> | 7.05 | -9.937  | -9.359 | -10.792 | -60.638 |
| <b>FNH64</b> | 7.05 | -9.938  | -9.013 | -11.294 | -50.543 |
| <b>FNH65</b> | 6.19 | -9.775  | -8.384 | -11.100 | -57.403 |
| <b>FNH66</b> | 6.10 | -9.748  | -9.365 | -11.478 | -62.964 |
| <b>FNH67</b> | 5.52 | -10.111 | -9.470 | -10.862 | -62.089 |
| <b>FNH68</b> | 8.00 | -10.629 | -9.254 | -11.521 | -69.715 |
| <b>FNH69</b> | 7.70 | -9.703  | -8.399 | -11.919 | -56.394 |
| <b>FNH70</b> | 7.92 | -9.749  | -8.123 | -10.199 | -61.217 |
| <b>FNH71</b> | 7.52 | -8.527  | -8.932 | -10.436 | -60.930 |
| <b>FNH72</b> | 7.18 | -9.136  | -7.977 | -9.903  | -49.937 |
| <b>FNH73</b> | 7.11 | -10.184 | -9.266 | -10.899 | -55.984 |
| <b>FNH74</b> | 7.30 | -10.217 | -9.626 | -10.855 | -64.185 |
| <b>FNH75</b> | 6.74 | -9.477  | -5.746 | -10.505 | -54.835 |
| <b>FNH76</b> | 7.40 | -10.552 | -9.263 | -11.892 | -65.856 |
| <b>FNH77</b> | 7.55 | -10.125 | -9.968 | -12.019 | -70.039 |
| <b>FNH78</b> | 7.74 | -9.798  | -7.995 | -11.306 | -49.883 |
| <b>FNH79</b> | 8.40 | -10.331 | -8.811 | -11.291 | -71.034 |
| <b>FNH80</b> | 7.06 | -10.946 | -8.594 | -11.716 | -57.751 |
| <b>FNH81</b> | 5.70 | -8.920  | -9.077 | -10.731 | -62.430 |
| <b>FNH82</b> | 6.52 | -10.399 | -9.352 | -11.451 | -64.702 |
| <b>FNH83</b> | 6.76 | -10.015 | -9.894 | -11.073 | -69.575 |

---
